1 **Title: What does it cost to expand two-way texting for**  
2 **post-operative follow-up? A cost analysis in routine**  
3 **voluntary medical male circumcision settings in South**  
4 **Africa**

5 **Short title: Cost analysis of two-way texting implementation**  
6 **and scale-up in South Africa**

7  
8  
9 Molly Unsworth<sup>1,2</sup>, Isabella Fabens<sup>1,2</sup>, Geoffrey Setswe<sup>3,7</sup>, Khumbulani Moyo<sup>4</sup>, Jacqueline  
10 Pienaar<sup>3</sup>, Calsile Makhele<sup>3</sup>, Motshana Phohole<sup>4</sup>, Nelson Igaba<sup>4</sup>, Sizwe Hlongwane<sup>4</sup>,  
11 Maria Sardini<sup>3</sup>, Tracy Dong<sup>8</sup>, Monisha Sharma<sup>2</sup>, Hannock Tweya<sup>1,2</sup>, Felex Ndebele<sup>3</sup>,  
12 Marrienne Holec<sup>1,2</sup> and Caryl Feldacker<sup>1,2</sup>

- 13  
14 1. International Training and Education Center for Health (I-TECH), Seattle, WA,  
15 United States of America  
16 2. Department of Global Health, University of Washington, Seattle, WA, United States  
17 of America  
18 3. The Aurum Institute, Johannesburg, South Africa  
19 4. Right to Care, Pretoria, South Africa  
20 5. Medic, Nairobi, Kenya

- 21 6. Department of Global Health, University of Washington, Seattle, WA USA  
22 7. Department of Health Studies, University of South Africa, Pretoria, South Africa  
23 8. Fred Hutchinson Cancer Center, Seattle, Washington, United States of America

24

25 Corresponding Author:

26 Caryl Feldacker, MPH, PhD

27 Email: [cfeld@uw.edu](mailto:cfeld@uw.edu)

## 28 **Abstract**

29 Up to 98% of adult voluntary medical male circumcision (VMMC) clients heal without  
30 adverse events (AEs) in South Africa and in the sub-Saharan Africa (SSA) region, yet all  
31 clients in South Africa (SA) are still required to attend in-person reviews, creating added  
32 work for providers and barriers for clients. A randomized controlled trial (RCT) using our  
33 fee-free, open-source, two-way texting (2wT) approach showed that males could  
34 independently monitor their healing with support from VMMC nurse-led telehealth and  
35 that 2wT was more cost-effective than routine visits for quality post-operative monitoring.  
36 The objectives of this costing activity were to assess the additive cost of 2wT vs. SoC  
37 during a stepped wedge design (SWD) expansion trial; costing an augmentation of 2wT  
38 with dedicated personnel during peak VMMC periods; and estimate the cost savings of  
39 2wT from the payer perspective if scaled in routine VMMC settings. Data was collected  
40 from routine financial reports and complemented by previous RCT time-motion estimates.  
41 We conducted activity-based costing of SWD and peak season periods; sensitivity  
42 analysis estimated 2wT costs at scale. We included data from 6,842 males, with 2,586  
43 (38%) opting for 2wT. 2wT participants attended an average of zero visits; SoC males  
44 had an average of 2 visits. Under 2wT, quality care markers improved and AE  
45 ascertainment increased while loss to follow-up (LTFU) decreased. Given a VMMC  
46 population of 10,000 adults, scenario analysis suggests that: 1) 2wT becomes cost  
47 neutral with 45% 2wT enrollment; 2) 2wT saves \$0.29/client with 60% 2wT enrollment;  
48 and 3) 2wT saves \$0.46/client with 80% 2wT enrollment. When implemented at scale,  
49 2wT appears to significantly reduce costs to the healthcare system while improving the  
50 quality of post-operative care and requiring no additional client costs. 2wT should be

51 expanded for eligible males across VMMC and other post-operative contexts in South  
52 Africa.

53

## 54 **Introduction**

55 For more than two decades, studies on adult voluntary medical male circumcision  
56 (VMMC) have demonstrated that VMMC is an efficient, safe, and cost-effective method  
57 to reduce the continued burden of HIV(1–3). Rates of moderate and severe adverse  
58 events (AEs) are less than 2% in VMMC programs at scale but multiple in-person post-  
59 operative visits within 14 days of the procedure continue to be recommended for all  
60 clients. In South Africa, despite few AEs, national guidelines require two in-person follow-  
61 up visits after VMMC, a largely unnecessary burden for most patients and their providers  
62 that may deter VMMC uptake(4,5).

63 Mobile health (mHealth) interventions in this context therefore offer an innovative  
64 way of utilizing digital technologies to reduce the burden of in-person visits for clients and  
65 healthcare workers. mHealth interventions can help the digitalization of overburdened  
66 healthcare systems, as well as assist with reaching remote or underserved areas by  
67 providing remote access to health services(6). Two prior randomized clinical trials (RCT)  
68 were conducted in routine VMMC clinics in Zimbabwe and South Africa, piloting a novel  
69 two-way texting (2wT) approach between eligible males ages 15-years and older and  
70 VMMC nurses(5,7). Both studies demonstrated that 2wT is safe, reduced follow-up  
71 workload, and is cost-effective compared to routine VMMC post-operative visits. However  
72 as both studies were done within the context of an RCT, the results did not explore the  
73 true costs of 2wT when implemented as part of routine VMMC care.

74 To further evaluate the effects of a 2wT in routine VMMC programs operating in  
75 South Africa, the International Training and Education Center for Health (ITECH) at the  
76 University of Washington, The Aurum Institute, Right to Care, and Medic built upon their  
77 RCT evidence by conducting a quasi-experimental, stepped wedge design (SWD)  
78 expansion study across three districts: an urban district in Gauteng province and both a  
79 peri-urban and a rural district in the North West province. The expansion study was  
80 conducted in two phases, intensive and maintenance, and 2wT was implemented as part  
81 of routine VMMC service delivery. Eligible males could opt-into 2wT follow-up as an  
82 alternative to scheduled, post-operative visits. During the intensive phase (January –  
83 October 2023 with follow-up through December 2023), sites continued to receive support  
84 from the research team, and the 2wT system continued to undergo revisions to increase  
85 usability in the routine setting. During the maintenance phase (January 2024, onward),  
86 sites received quality assurance support from the study team, preparing them to fully  
87 maintain the 2wT approach independently by the end of 2024. Results on clinical  
88 outcomes from the SWD that demonstrated 2wT safety and effectiveness were published  
89 separately(8).

90 Despite cost often being identified as a key outcome, there remains a lack of  
91 transparency and comprehensive cost evaluation of mHealth interventions(9,10). Scale-  
92 up of previous mHealth interventions in low- and middle-income countries (LMIC) has  
93 failed due to a lack of data on the cost of programs at scale(11). While the evidence base  
94 has grown in recent years, there remains a need for high-quality economic evaluation to  
95 better understand the complexities and implications of scaling up digital health

96 strategies(12). Further evidence of economic evaluation using an implementation science  
97 lens is needed to support the scale-up of mHealth interventions in routine practice.

98 Therefore, to complement the safety and effectiveness evidence from the SWD,  
99 we embedded a costing study with three objectives: (1) assess the additive cost of  
100 implementing 2wT for follow-up during the intensive phase of the stepped wedge design  
101 SWD, (2) measure the costs of augmenting 2wT personnel to reach high 2wT demand  
102 during peak VMMC season, and (3) estimate the cost savings of 2wT compared to routine  
103 VMMC follow-up at scale from the payer perspective. By looking at costs of 2wT when  
104 implemented in routine VMMC clinics without RCT conditions, we aim to provide updated  
105 estimates on the costs associated with the use of 2wT in routine practice, during common  
106 VMMC campaign approaches, and inform the feasibility of 2wT expansion in routine  
107 practice.

108

## 109 **Methods**

### 110 **Background**

#### 111 **2wT intervention**

112 The open-source 2wT technology and implementation approach for VMMC follow-  
113 up has been previously described in detail(7,13,14). Briefly, the 2wT approach provides  
114 an option for clients to choose interactive, text-based telehealth with a dedicated 2wT  
115 VMMC nurse in lieu of in-person visits the standard of care (SoC), for post-VMMC follow-  
116 up. The hybrid 2wT system combines automated education messages along with  
117 messages requesting a client response to confirm appropriate healing. 2wT allows for

118 clients to interact with a clinician who can provide reassurance, wound care instructions,  
119 and refer them to in-person review for potential complications during the critical 14-days  
120 post VMMC procedure. 2wT participants can always seek in-person care when desired.  
121 2wT does not require clients to have a smartphone; clients can use any basic mobile  
122 phone with SMS capability and communicate in various local languages.

123 For clinics, 2wT participants are managed via the open-source app that is  
124 downloaded onto smartphones, tablets, or desktop computers. Enrollment of clients in  
125 2wT, education on using the 2wT system, and 2wT-specific post-operative counseling, as  
126 well as any needed or requested in-person follow-up visits for 2wT participants all take  
127 place at routine VMMC clinics (“spokes”), with care provided by existing VMMC teams.  
128 The 2wT dedicated nurse (“hub”), is the first line of communication with 2wT participants  
129 from all sites, providing clinical care via messaging, conducting initial phone tracing for  
130 clients who failed to respond to texts, and referring clients back to their 2wT enrollment  
131 VMMC clinic “spoke” for follow-up care if needed. The 2wT system includes quality  
132 assurance prompts. For the hub, if a client does not respond by day 3 after VMMC, the  
133 hub nurse receives a “Task” to follow up that client by phone, clearing the Task by  
134 documenting whether the client was reached and ok; reached and referred to care; or not  
135 reached so referred to the site for tracing (unknown client status). For the sites (spokes),  
136 clients referred to care from the hub generate a “Task” for them to complete after client  
137 review, noting whether the client was okay (no AE); was confirmed with an AE; or did not  
138 return (with options that client was reached and was ok or client not reached).

139

140 **Stepped wedge design (SWD): implementation and results**

141           The expansion study was implemented across study sites in two phases using a  
142 hub-to-spoke model. During the intensive SWD phase, routine VMMC clinics acted as the  
143 spokes and received support from the 2wT research team who provided training, quality  
144 assurance, and clinical oversight while also maintaining the centralized 2wT hub.  
145 Between January and December 2023, in the SWD, 2,856 of 6,842 clients opted into 2wT  
146 (37.8%) across three intervention waves and two platforms (SMS or WhatsApp). Among  
147 those with post-operative follow-up, the AE ascertainment rate was higher among 2wT  
148 participants (0.60%) than SoC clients (0.13%) ( $p = 0.0018$ ). On average, 2wT participants  
149 had 2.1 fewer visits compared to SoC clients ( $p < 0.001$ ). Among 2wT participants,  
150 1832/2586 (71%) responded via 2wT by Day3 and 2,069/2,586 (80%) responded via 2wT  
151 over 14 days. Lost to follow-up (LTFU), or no response or visit, was documented for 93  
152 2wT participants (3.6%) and 342 (8.0%) SoC clients(8).

153           Following the completion of the intensive phase, the study transitioned to a  
154 maintenance phase, starting January 2024, during which the study-supported 2wT team  
155 was gradually withdrawn, with the aim of fully transitioning the 2wT system and  
156 management to local teams over an additional year of implementation.

157

## 158 **2wT enrollment threshold: Identifying a 2wT quality gap during VMMC** 159 **campaigns**

160           In South Africa, similar to other high priority VMMC countries in SSA, VMMC clinics  
161 experience seasonal fluctuation: the months of June and July are often high-volume  
162 VMMC campaign periods, with smaller campaigns in March and September. A large  
163 proportion of annual circumcision productivity takes place in these higher demand



164 periods, often with focus on reaching adolescent boys ages 15 and older who are on  
165 school holidays(15,16). During the intensive SWD phase, the 2023 VMMC campaign  
166 period saw 2wT enrollments spike from a weekly high of approximately 200 to over 450,  
167 resulting in approximately 900 clients simultaneously in the 2wT system in the first 14-  
168 days. This high-volume VMMC period and surge in 2wT enrollment created an  
169 extraordinary workload for the 2wT hub, resulting in delays in completing the tracing Task  
170 for 2wT participants who had not responded to 2wT texts by day 3. **Figure 1** illustrates  
171 that during the 4-week campaign period, including only clients in June and July 2023, the  
172 total number of 2wT participants who did not respond by day 3 after VMMC was 499 of  
173 1,464 (34%) of which 274/1,464 (19%) were not successfully traced by the hub. During  
174 the non-campaign months, 294/1,122 (26%) of 2wT participants did not respond by day  
175 3, but only 7% of the Tasks did not result in successfully tracing by the hub. This  
176 comparison suggests that there is a 2wT participant to hub threshold at which the quality  
177 of 2wT-based care may diminish. A forthcoming paper will examine the 2wT tracing and  
178 referral cascade, including this gap in 2wT quality when the threshold is reached.

179

180 **Fig 1. Resolution of tracing tasks by the hub for 2wT participants during campaign**  
181 **periods vs. routine VMMC levels, South Africa, 2023.**

182

## 183 **Costing methodology**

184 We performed a micro-costing analysis of 2wT in routine settings from the  
185 perspective of the program implementer. Costs to VMMC clients were excluded. Primary  
186 data collected during the intensive and maintenance phases of the SWD was used to

187 estimate the additive cost of 2wT and the costs of increasing staff support during  
188 campaign periods. To estimate the cost savings compared to in-person VMMC follow-up,  
189 we used data on routine care that was collected during the earlier RCT as data on routine  
190 clinic-based follow-up was not collected during the SWD study period. All costs are  
191 financial costs reported in 2023 U.S. dollar values (USD).

192

### 193 **Objective 1: Additive costs of implementing 2wT in routine VMMC care**

194 Cost data was taken from program financial records, RCT study logs, SWD study  
195 logs, and inputs from study staff. Cost parameters from the study period are presented in  
196 **Table 1**. Costs collected in South African rand (ZAR) were converted to United States  
197 dollar (USD) using the average exchange rate over the study period of ZAR 18.577 =  
198 \$1.00 USD. Costs were grouped into four distinct categories (**Table 1**): personnel costs,  
199 recurrent costs, variable costs, and capital costs. Personnel costs included the salaries  
200 of the hub nurse, project administrator, and IT professional for 2wT system up-keep.  
201 Recurrent costs included monthly fees associated with the maintenance and usage of the  
202 2wT system, including reverse billing to cover all client messaging costs, as well as the  
203 cost of airtime for the hub nurse. Variable costs included the cost of client SMS messages,  
204 which was calculated by multiplying the unit cost of a single text message by the number  
205 of texts sent per client during the study period. Capital costs were the equipment needed  
206 for 2wT client management by the hub nurse, including a laptop and mobile phone.  
207 Capital costs were annualized assuming a 5-year useful life and discounted annually at  
208 3%, the standard recommended for economic evaluation in LMICs(17). The total cost of

209 the intervention over the study period was divided by the number of 2wT participants to  
210 determine the cost per client.

211

212 **Table 1. Cost categories and descriptions of costs from the intensive phase of SWD**  
213 **that were included in the cost analysis.**

| Cost Category   | Description                                                                                                                                                           |
|-----------------|-----------------------------------------------------------------------------------------------------------------------------------------------------------------------|
| Recurrent costs | Monthly costs of fees associated with hosting and maintaining the 2wT system (server hosting 2wT system, SMS gateway integration, API fee) and airtime for hub nurse. |
| Variable costs  | The cost of all SMS messages sent by 2wT participants and the hub nurse.                                                                                              |
| Capital costs   | One-time cost of laptop and mobile phone for hub nurse.                                                                                                               |
| Personnel costs | The staff salary of a project administrator, 2wT-specific hub nurse, and IT professional for 2wT system maintenance.                                                  |

214 Abbreviations: SMS, short-messaging system; API, application programming interface; 2wT, two-way  
215 texting; IT, information technology

216

## 217 **Objective 2: Costs of augmenting 2wT during campaign periods**

218 To evaluate the additive personnel cost needed to ensure quality 2wT  
219 implementation during the busy season campaign, we used cost data from the 2024 pilot  
220 program. We calculated the total cost and cost per client of meeting campaign period  
221 demand for 2wT. Personnel costs included the monthly stipend of the intern and the  
222 increase in full-time equivalent (FTE) for the hub nurse. Additional costs were the tablets  
223 and airtime used by each intern. Tablet costs were annualized assuming a 5-year useful

224 life and discounted annually at 3%. Based on data collected during the 2023 and 2024  
225 campaign periods, we assumed a total rate of 500 new clients per week during the busy  
226 season across all sites. We calculated the monthly cost per site of the pilot program by  
227 summing the additional personnel costs and annualized cost of one tablet for 4-weeks.  
228 The total cost of implementing the pilot program for a 5-week program was calculated by  
229 adding the additional cost of increasing the hub nurse FTE along with the costs associated  
230 with hiring one intern per site. The total cost per client was calculated by dividing the total  
231 cost per category by the total number of expected clients for the 5-week period.

232

233

### 234 **Objective 3: Estimating cost savings of 2wT implementation in routine** 235 **clinical practice**

236 Costing estimates from the intensive phase and subsequent pilot program for the  
237 2024 busy season were used along with prior data collected during the RCT to estimate  
238 the per client cost savings of implementing 2wT in routine VMMC clinics. Data collected  
239 during the intensive phase was used for parameter estimates on the average number of  
240 follow-up visits, reported rate of moderate/severe AEs, LTFU rate of clients, and salaries  
241 of 2wT personnel. Parameter estimates collected during the RCT were used to determine  
242 the cost of follow-up visits and tracing. As data was not available during the SWD on the  
243 number of routine and 2wT participants for which tracing was initiated, the cost of client  
244 tracing assumed that all clients who were LTFU had three phone calls and three home  
245 tracing attempts, as is standard.

246

## 247 *Sensitivity analysis*

248           Univariate sensitivity analyses were used to assess the most influential parameters  
249 for cost savings of 2wT compared to routine VMMC follow-up. The base-case scenario  
250 was based on the enrollment-level and proportion of clients enrolled in 2wT from the  
251 intensive phase of the SWD. All parameters were varied using a range of +/- 20%.

252

## 253 **Ethics**

254           The protocol for the scale-up of 2wT as part of the SWD was approved by the  
255 review boards of the University of Washington (Study 00009703; PI Feldacker) and the  
256 University of Witwatersrand, Human Research Ethics Committee (No. 200204; PI  
257 Setswe). No informed consent was undertaken for this follow-up approach as 2wT was  
258 implemented as part of routine VMMC procedures for males ages 15 and older.

259

## 260 **Results**

261           During the intensive intervention phase of the SWD, 6,842 males aged 15 years  
262 or older underwent VMMC: 2586 (38%) opted to participate in 2wT for follow-up. From  
263 the SWD clinical outcomes, we found that on average, 2wT participants had 0.07 visits  
264 (SD 0.30) compared to 2.04 visits among routine clients (SD 0.75)(8). Routine clients had  
265 a higher rate of loss to follow-up (LTFU) at 8% compared to 2wT participants at 4%.(8)

266

## 267 **Objective 1: Additive costs of implementing 2wT in routine VMMC care**

268 During the intensive phase of SWD, 2wT-specific activities provided an additional  
 269 cost per client of \$9.53: \$5.39 was due to research-specific costs and \$4.14 was  
 270 attributable to routine 2wT administration (**Table 2**). Of the \$4.14 increased cost of routine  
 271 administration: \$0.50 were recurrent costs related to the 2wT technology, \$0.26 were  
 272 variable costs of SMS messaging, and \$3.38 were personnel costs.

273

274

275 **Table 2. (A) Cost parameters and (B) cost per client of 2wT for VMMC follow-up during the**  
 276 **intensive stepped wedge implementation, January 30 – November 2, 2023.**

| <b>A.</b>                              |              |                              |                     |
|----------------------------------------|--------------|------------------------------|---------------------|
| <b>Routine-administration for 2wT</b>  |              |                              |                     |
| <b>Cost Category</b>                   | <b>Input</b> | <b>Range (if applicable)</b> | <b>Source</b>       |
| <b>Recurrent Costs</b>                 |              |                              |                     |
| Africa Is Talking (API)                | \$107.66     |                              | Study budget report |
| SMS bundles (TextIT)                   | \$25.00      |                              | Study budget report |
| Hub nurse airtime/data                 | \$10.77      |                              | Study budget report |
| <b>Variable Costs</b>                  |              |                              |                     |
| Cost per SMS                           | \$0.01       |                              | Study budget report |
| Number of outgoing texts               | 13           |                              | Study log           |
| Number of incoming texts               | 7            |                              | Study log           |
| <b>Personnel Costs</b>                 |              |                              |                     |
| Project administrator wage (per month) | \$520.37     |                              | Aurum               |
| <i>FTE for 2wT</i>                     | <i>20%</i>   |                              | <i>Study log</i>    |
| Hub nurse wage (per month)             | \$1,426.47   | \$1,345.73 - \$1,507.22      | Aurum               |
| <i>FTE for 2wT</i>                     | <i>40%</i>   |                              | <i>Study log</i>    |
| IT professional wage (per month)       | \$4,312.50   | \$4125 - \$4500              | I-TECH              |

|                                        |              |                              |                     |
|----------------------------------------|--------------|------------------------------|---------------------|
| <i>FTE for 2wT</i>                     | 6.7%         |                              | <i>Study log</i>    |
| <b>Research-specific</b>               |              |                              |                     |
| <b>Cost Category</b>                   | <b>Input</b> | <b>Range (if applicable)</b> | <b>Source</b>       |
| <b>Recurrent Costs</b>                 |              |                              |                     |
| Server hosting (Amazon Web Services)   | \$300.00     |                              | Study budget report |
| <b>Capital Costs</b>                   |              |                              |                     |
| Laptop                                 | \$349.89     |                              | Study budget report |
| Cellphone                              | \$16.15      |                              | Study budget report |
| <b>Personnel Costs</b>                 |              |                              |                     |
| Project administrator wage (per month) | \$520.37     |                              | Aurum               |
| <i>FTE for 2wT</i>                     | 80%          |                              | <i>Study log</i>    |
| Hub nurse wage (per month)             | \$1,426.47   | \$1,345.73 - \$1,507.22      | Aurum               |
| <i>FTE for 2wT</i>                     | 60%          |                              | <i>Study log</i>    |

277

278

279

280

281

282

283

284

285

286

287

288

|                                         |                        |
|-----------------------------------------|------------------------|
| <b>B.</b>                               |                        |
| <b>Cost Category</b>                    | <b>Cost per Client</b> |
| <b>Routine-administration</b>           |                        |
| Recurrent costs                         | \$0.50                 |
| Variable costs                          | \$0.26                 |
| Personnel costs                         | \$3.38                 |
| <b>Total</b>                            | <b>\$4.14</b>          |
| <b>Research-specific</b>                |                        |
| Recurrent costs                         | \$0.26                 |
| Capital costs                           | \$0.02                 |
| Personnel costs                         | \$5.10                 |
| <b>Total</b>                            | <b>\$5.39</b>          |
| <b>Total cost per client (n = 2586)</b> | <b>\$9.53</b>          |

289

290

291

## 292 **Objective 2: Costs of augmenting 2wT during campaign periods**

293 The pilot program to augment 2wT personnel to ensure quality 2wT during  
294 campaign periods cost \$1,157.37 per month for one site, with \$857.15 to increase the  
295 FTE of the hub nurse and \$284.96 for an additional 2wT-specific intern (**Table 3**). We use  
296 the average of 500 clients/week, combined, across 3 sites observed in the 2023 and 2024  
297 campaign periods. Implementing the 2wT staff augmentation for a one-month campaign  
298 period at this enrollment level would increase the cost per client by \$0.81.

299

300

301 **Table 3. Cost estimates for 2wT support staff scale-up for a 1-month VMMC campaign**  
302 **period.**

| <b>Cost Category</b>           | <b>Monthly cost*<br/>(per site)</b> | <b>Cost per client<br/>(n = 2,000)</b> |
|--------------------------------|-------------------------------------|----------------------------------------|
| <b>Personnel costs</b>         |                                     |                                        |
| Centralized EN nurse 100%      | \$857.15*                           |                                        |
| Additional project intern 100% | \$284.96                            |                                        |
|                                | <b>\$1,142.12</b>                   | <b>\$0.79</b>                          |
| <b>Recurrent costs</b>         |                                     |                                        |
| Airtime for project intern     | <b>\$10.78</b>                      | <b>\$0.01</b>                          |
| <b>Capital costs</b>           |                                     |                                        |
| Annualized equipment           | <b>\$4.24</b>                       | \$0.01                                 |



|              |                   |               |
|--------------|-------------------|---------------|
| <b>Total</b> | <b>\$1,157.37</b> | <b>\$0.81</b> |
|--------------|-------------------|---------------|

303 Abbreviations: SMS, short-messaging system

304 \*Hub nurse salary would be shared across multiple sites in hub-spoke model

305

306 **Objective 3: Estimating cost savings of 2wT implementation in**  
307 **standard (non-research) clinical practice**

308 The parameters used to calculate the cost savings of 2wT compared to routine  
309 VMMC follow-up are included in **Table 4**. For a district performing 10,000 VMMCs  
310 annually, enrolling clients in 2wT at the rate observed during the intensive phase of the  
311 SWD (40%) would increase costs by \$0.06 per client. 2wT becomes cost neutral with  
312 45% enrollment into the intervention. Increasing enrollment to 80% would reduce the  
313 mean cost by \$0.46/client. Further scaled up to a scenario where 100,000 VMMCs are  
314 performed annually, at 40% enrollment in 2wT costs of follow-up would be reduced by  
315 \$0.88/client, decreasing by \$0.93/client at 80% enrollment.

316 The base-case compared the cost per client of 2wT to routine in-person follow-up,  
317 assuming implementation at the level observed during the intensive phase of the SWD.  
318 We assumed 10,000 annual VMMCs and an enrollment rate of 40% in 2wT, resulting in  
319 an increased cost of \$0.06/client in the base-case scenario. In the univariate sensitivity  
320 analysis (**Fig 2**), the cost savings of 2wT for post-VMMC follow-up compared to routine  
321 in-person visits was most sensitive to the enrollment rate in 2wT, average number of  
322 follow-up visits attended by routine clients, and minutes spent by clinicians at post-  
323 operative visits.

324

325 **Table 4. (A) Cost parameters and (B) estimated cost savings per client of 2wT vs.**  
 326 **routine VMMC follow-up for extended implementation of 2wT**  
 327

| <b>A.</b>                                  |                |            |                               |
|--------------------------------------------|----------------|------------|-------------------------------|
| <b>Cost Inputs</b>                         | <b>Routine</b> | <b>2wT</b> | <b>Source</b>                 |
| General                                    |                |            |                               |
| Number of clients                          | 4256           | 2586       | SWD                           |
| Average number of follow-up visits         | 2.06           | 0.07       |                               |
| Number of moderate/severe AEs (%)          | 0.13%          | 0.60%      |                               |
| Number of clients lost to follow-up        | 342            | 93         |                               |
| Number of sites                            | 3              | 3          |                               |
| Duration of study (years)                  | 0.718          | 0.718      |                               |
| Annual duration of campaign period (weeks) | 4              | 4          |                               |
| Personnel                                  |                |            |                               |
| Enrolled cadre level nurse wage (monthly)  | \$1,426.47     | \$1,426.47 | Aurum Institute pay structure |
| IT/data manager wage (monthly)             | -              | \$4,312.50 | I-TECH DIGI                   |
| Intern wage (monthly)                      | -              | \$284.96   | SWD                           |
| 2wT text messaging                         |                |            |                               |
| SMS system aggregated cost (monthly)       | -              | \$132.66   | Africa is Talking, TextIT     |
| Cost per SMS message                       | -              | \$0.01     | SWD                           |
| Average number of messages per client      | -              | 20         | SWD                           |
| Staff airtime cost (monthly)               | -              | \$10.78    |                               |
| Post-op counseling                         |                |            |                               |

|                                        |        |        |                                        |
|----------------------------------------|--------|--------|----------------------------------------|
| Nurse review time (minutes)            | 5      | 10     | RCT (assumption)                       |
| In-clinic follow-up visits             |        |        |                                        |
| Nurse review time in-clinic (minutes)  | 5.45   | 5.45   | RCT (time-motion study)                |
| Client tracing                         |        |        |                                        |
| Number of phone call attempts          | 3      | 3      | RCT                                    |
| Length of tracing phone call (minutes) | 5      | 5      |                                        |
| Number of home tracing attempts        | 3      | 3      |                                        |
| Mean distance to patient home (km)     | 29.73  | 29.73  |                                        |
| Liter of petrol (per km)               | 0.06   | 0.06   |                                        |
| Price of petrol (per liter)            | \$1.23 | \$1.23 | Automobile Association of South Africa |

328  
 329 Abbreviations: I-TECH, International Training and Education Center for Health; DIGI, Digital Initiatives  
 330 Group at I-TECH; RCT, randomized controlled trial; 2wT, two-way texting; SWE, stepped wedge expansion

| <b>B.</b>                        |                        |                               |
|----------------------------------|------------------------|-------------------------------|
| Annual number of VMMCs performed | Enrollment rate in 2wT | Cost savings: 2wT vs. routine |
| 10,000                           | 40%                    | \$0.06                        |
|                                  | <b>45%</b>             | <b>\$0.00 – cost neutral</b>  |
|                                  | 60%                    | -\$0.29                       |
|                                  | 80%                    | -\$0.46                       |
| 100,000                          | 40%                    | -\$0.88                       |
|                                  | 60%                    | -\$0.91                       |
|                                  | 80%                    | -\$0.93                       |

331  
 332  
 333 **Fig 2. Univariate sensitivity analysis of input factors comparing 2wT to routine care.**

334 All variables that changed the incremental cost by more than \$0.15 are shown. Colors  
335 correlate to input ranges of each parameter. (e.g., 32% enrollment rate in 2wT increases  
336 costs by \$0.26/client while a 75% enrollment rate decreases costs by \$0.45/client)

337

## 338 **Discussion**

339 When implemented in routine VMMC clinical practice at small scale, 2wT follow-  
340 up increased AE ascertainment and reduced LTFU, increasing the quality of post-  
341 operative care. At small scale, 2wT also raised costs by approximately \$4/client – a  
342 modest additional cost to the payer balanced by fewer in-person visits, increased AE  
343 ascertainment, and decreased rates of LTFU. However, when operating at scale in a  
344 district performing a reasonable 10,000 VMMCs annually, scenario analysis suggests that  
345 2wT becomes cost neutral with 45% 2wT enrollment; saves \$0.29/client with 60% 2wT  
346 enrollment; and saves \$0.46/client with 80% 2wT enrollment without consideration of the  
347 cost impact of improved quality, monitoring, and client engagement in care. During 4-  
348 week campaign periods, to ensure 2wT quality and adherence to protocols, adding  
349 temporary, dedicated 2wT personnel would cost an additional \$0.81/client. Across all 12  
350 months, even with additional human resources during peak VMMC operations, it again  
351 appears that 2wT becomes cost neutral when implemented on larger scales or with  
352 increased enrollment rates. This strongly suggests that 2wT could lead to significant  
353 health system savings. These results align with prior costing studies on 2wT for VMMC  
354 follow-up in Zimbabwe and South Africa, which found 2wT to be a cost-effective method  
355 to increase AE ascertainment and improve the quality of post-operative care at scale.  
356 Several discussion points inform 2wT scale-up decisions.

357 First, while our results differ from what was previously reported in the 2022 2wT  
358 RCT in South Africa(18), they provide an updated cost estimate for routine 2wT  
359 implementation. The RCT costing analysis found that 2wT could save \$3.56 per client. In  
360 this SWD, we suggest that enrolling 4,000 2wT participants per year in a district that  
361 performs 10,000 VMMCs annually would only add a minimal \$0.06 per 2wT client, with  
362 increased cost savings when a greater proportion of clients enroll. The difference in cost  
363 savings between RCT and more routine SWD conditions is likely due to several key  
364 implementation factors. First, the RCT did not include additional costs of maintaining the  
365 2wT system, recurrent monthly technology fees, or equipment needed for systems  
366 operation, which were included in this analysis. Second, the RCT estimated costs  
367 separately in rural and urban areas, and found more cost savings in rural areas, while in  
368 the SWD, the clients were predominantly urban. Lastly, the RCT included time-in-motion  
369 observations to allocate time, and therefore cost, more accurately (e.g., client tracing  
370 activities, additional clinic costs for visits (reception, clerk), an activity that we could not  
371 undertake in this small, embedded costing study.

372 Second, personnel costs make up the largest proportion of 2wT-specific costs,  
373 demonstrating the continued need for adequate staffing for mHealth interventions to  
374 ensure quality implementation and monitoring. 2wT does not remove the need for VMMC  
375 client follow-up, but rather dramatically improves the efficiency of care. By no longer  
376 requiring in-person follow-up visits, 2wT reduces the time clinicians and staff at clinics  
377 need to spend on unnecessary clinic reviews. However, clinician oversight is still needed  
378 to monitor 2wT client healing and complete reviews for 2wT clients with desire or need  
379 for in-person care. In the SWD, during routine VMMC client volume, a dedicated 2wT-

380 specific VMMC nurse spent an estimated 40% of their work time responding to clients  
381 with concerns via text message and phone call, if desired, directing them to return to their  
382 clinic for in-person follow-up. During high-enrolling campaign periods, a full time 2wT hub  
383 clinician was needed with support from an auxiliary intern at each 2wT enrolling site to  
384 complete critical activities like confirming 2wT enrollments on participant phones, alerting  
385 VMMC teams for tracing or referral tasks, and reconciling paper to digital records. 2wT  
386 makes VMMC follow-up more efficient and raises the quality of post-operative care when  
387 implemented according to standard operating procedures. 2wT reduces, but does not  
388 remove, the need for clinical oversight and quality care assurances. During scale-up,  
389 personnel costs could be reduced by using a trained enrolled nurse, a lower category of  
390 nurse, instead of a professional nurse, as with additional training they can offer the same  
391 quality of follow up care.

392 Third, by using the activity-based costing method, we provide clarity on the  
393 potential cost savings of 2wT while increasing the transparency around the costs of  
394 scaling up mHealth interventions. The lack of data on costs, especially in scale-up,  
395 remains a key barrier in implementing mHealth interventions, particularly in LMIC(9). By  
396 separating the costs of implementation during the intensive phase of the SWD into  
397 routine-administration and research-specific costs, we demonstrate the variation of cost  
398 during the research-supported phase versus the cost to the funder while transitioning to  
399 independent management. Referring to recommendations on the scope and  
400 disaggregation of costs, we reported estimates using a micro-costing approach to  
401 increase accuracy and separated costs by phase to delineate the long-term costs of  
402 scale-up(9,19,20).

403 Our study had several limitations. First, the cost savings of 2wT compared to  
404 routine in-person follow-up was estimated using data collected during the prior RCT, as  
405 data on post-operative visits and client tracing was not collected during the SWD.  
406 However, RCT tracing rates and time-motion data stemmed from both rural and urban  
407 clinics operated by the same implementing partner, reducing bias in tracing and provider  
408 time estimates. Second, the technology costs in 2wT changed over the study period;  
409 however, these changes are typical in the lifecycle of mHealth technology, including  
410 increasing monthly website-hosting or monthly data fees, indicating a challenge in costing  
411 mHealth interventions (20). Finally, we likely underestimated the costs associated with  
412 client tracing for both 2wT and routine clients. Due to lack of routine tracing data, we  
413 calculated tracing costs for clients identified as LTFU, ignoring the maximum amount of  
414 effort (3 phone calls and 3 home visits) that could have been undertaken for each.  
415 Therefore, our estimate may underestimate 2wT cost savings as routine clients were  
416 more likely to be LTFU.

417

## 418 **Conclusion**

419 Overall, evidence from this cost analysis of the 2wT approach in routine settings  
420 found that implementation would be cost-neutral to the payer with low enrollment and cost  
421 savings at scale. Combining with previous evidence that 2wT safeguards client safety  
422 while improving the quality of post-operative care, there are clear advantages to adoption  
423 of the opt-in 2wT approach for males who want to receive telehealth-based follow-up.  
424 Further scale-up would likely increase cost savings and dramatically reduce the burden  
425 of in-person reviews on clinics and clients.

426

## 427 **Acknowledgements**

428           The authors would like to thank the national and provincial Departments of Health  
429 of the Gauteng and North West; implementing partner, Right to Care, for enabling  
430 participation of the clinical teams; men who participated in the expansion study, and the  
431 Aurum Institute study implementation team for their dedication and skill in study  
432 implementation.

433

## 434 **Funding**

435           Research reported in this publication was supported by the National Institute of  
436 Nursing Research (NINR) of the National Institutes of Health under award number  
437 5R01NR019229, “Expanding and Scaling Two-way Texting to Reduce Unnecessary  
438 Follow-Up and Improve Adverse Event Identification Among Voluntary Medical Male  
439 Circumcision Clients in the Republic of South Africa.” Statistical support was provided by  
440 the University of Washington and its Fred Hutch Center for AIDS Research, a National  
441 Institutes of Health (NIH)-funded program under award number AI027757 that is  
442 supported by the following NIH Institutes and Centers: National Institute of Allergy and  
443 Infectious Diseases, National Cancer Institute, National Institute of Mental Health,  
444 National Institute on Drug Abuse, Eunice Kennedy Shriver National Institute of Child  
445 Health and Human Development, National Heart, Lung and Blood Institute, National  
446 Investigation Agency, National Institute of General Medical Sciences, and National  
447 Institute of Diabetes and Digestive and Kidney Diseases. The content is solely the



448 responsibility of the authors and does not necessarily represent the official views of the  
449 National Institutes of Health.

450

## 451 **Conflicts of Interest**

452 None declared.

## 453 **References**

- 454 1. Farley TM, Samuelson J, Grabowski MK, Ameyan W, Gray RH, Baggaley R.  
455 Impact of male circumcision on risk of HIV infection in men in a changing  
456 epidemic context – systematic review and meta-analysis. *J Int AIDS Soc.*  
457 2020 Jun 18;23(6):e25490.
- 458 2. Luseno WK, Rennie S, Gilbertson A. A review of public health, social and  
459 ethical implications of voluntary medical male circumcision programs for HIV  
460 prevention in sub-Saharan Africa. *Int J Impot Res.* 2023 May;35(3):269–78.
- 461 3. UNAIDS. Voluntary medical male circumcision — Steady progress in the  
462 scaleup of VMMC as an HIV prevention intervention in 15 eastern and  
463 southern African countries before the SARS-CoV2 pandemic [Internet].  
464 Geneva, Switzerland; 2021 [cited 2024 Sep 4]. Available from:  
465 [https://www.unaids.org/en/resources/documents/2021/voluntary-medical-](https://www.unaids.org/en/resources/documents/2021/voluntary-medical-male-circumcision-15-eastern-southern-african-countries)  
466 [male-circumcision-15-eastern-southern-african-countries](https://www.unaids.org/en/resources/documents/2021/voluntary-medical-male-circumcision-15-eastern-southern-african-countries)
- 467 4. Davis SM, Hines JZ, Habel M, Grund JM, Ridzon R, Baack B, et al. Progress  
468 in voluntary medical male circumcision for HIV prevention supported by the  
469 US President’s Emergency Plan for AIDS Relief through 2017: longitudinal  
470 and recent cross-sectional programme data. *BMJ Open.* 2018 Sep  
471 1;8(8):e021835.
- 472 5. Feldacker C, Murenje V, Barnhart S, Xaba S, Makunike-Chikwinya B,  
473 Holeman I, et al. Reducing provider workload while preserving patient safety  
474 via a two-way texting intervention in Zimbabwe’s voluntary medical male

- 475           circumcision program: study protocol for an un-blinded, prospective, non-  
476           inferiority, randomized controlled trial. *Trials*. 2019 Jul 23;20(1):451.
- 477       6.     Aboye GT, Simegn GL, Aerts JM. Assessment of the Barriers and Enablers of  
478           the Use of mHealth Systems in Sub-Saharan Africa According to the  
479           Perceptions of Patients, Physicians, and Health Care Executives in Ethiopia:  
480           Qualitative Study. *J Med Internet Res*. 2024 Mar 27;26(1):e50337.
- 481       7.     Feldacker C, Pienaar J, Wasunna B, Ndebele F, Khumalo C, Day S, et al.  
482           Expanding the Evidence on the Safety and Efficiency of 2-Way Text  
483           Messaging–Based Telehealth for Voluntary Medical Male Circumcision  
484           Follow-up Compared With In-Person Reviews: Randomized Controlled Trial  
485           in Rural and Urban South Africa. *J Med Internet Res*. 2023 May  
486           9;25(1):e42111.
- 487       8.     Feldacker C, Fabens I, Dong T, Moyo K, Makhele C, Phohole M, et al.  
488           Strengthening evidence for text-based telehealth in post-operative care: A  
489           pragmatic study of the reach and effectiveness of two-way, text-based follow-  
490           up after voluntary medical male circumcision in South Africa. *PLOS One*.  
491           2024 Nov 11; Forthcoming.
- 492       9.     Iribarren SJ, Cato K, Falzon L, Stone PW. What is the economic evidence for  
493           mHealth? A systematic review of economic evaluations of mHealth solutions.  
494           *PLOS ONE*. 2017 Feb 2;12(2):e0170581.
- 495       10.    Wagner TH, Yoon J, Jacobs JC, So A, Kilbourne AM, Yu W, et al. Estimating  
496           Costs of an Implementation Intervention. *Med Decis Making*. 2020 Nov  
497           1;40(8):959–67.

- 498 11. Sant Fruchtmann C, Mbuyita S, Mwanyika-Sando M, Braun M, de Savigny D,  
499 Cobos Muñoz D. The complexity of scaling up an mHealth intervention: the  
500 case of SMS for Life in Tanzania from a health systems integration  
501 perspective. *BMC Health Serv Res*. 2021 Apr 14;21(1):343.
- 502 12. Labrique A, Vasudevan L, Weiss W, Wilson K. Establishing Standards to  
503 Evaluate the Impact of Integrating Digital Health into Health Systems. *Glob  
504 Health Sci Pract*. 2018 Oct 10;6(Supplement 1):S5–17.
- 505 13. Feldacker C, Holeman I, Murenje V, Xaba S, Korir M, Wambua B, et al.  
506 Usability and acceptability of a two-way texting intervention for post-operative  
507 follow-up for voluntary medical male circumcision in Zimbabwe. *PLOS ONE*.  
508 2020 Jun 16;15(6):e0233234.
- 509 14. Marongwe P, Wasunna B, Gavera J, Murenje V, Gwenzi F, Hove J, et al.  
510 Transitioning a digital health innovation from research to routine practice:  
511 Two-way texting for male circumcision follow-up in Zimbabwe. *PLOS Digit  
512 Health*. 2022 Jun 15;1(6):e0000066.
- 513 15. Gold E, Mahler H, Boyee D. Overcoming Seasonality in Scaling Up Voluntary  
514 Medical Male Circumcision: A Case Study from Tanzania. In *Strengthening  
515 High Impact Interventions for an AIDS-free Generation (AIDSFree) Project.*;  
516 2015. p. 16.
- 517 16. Nxumalo CT, Mchunu GG. Circumcised men's perceptions, understanding  
518 and experiences of voluntary medical male circumcision in KwaZulu-Natal,  
519 South Africa. *South Afr Fam Pract [Internet]*. 2020 May 19 [cited 2024 Sep  
520 24];62(2).

- 521 17. Wilkinson T, Sculpher MJ, Claxton K, Revill P, Briggs A, Cairns JA, et al. The  
522 International Decision Support Initiative Reference Case for Economic  
523 Evaluation: An Aid to Thought. *Value Health*. 2016 Dec 1;19(8):921–8.
- 524 18. Su Y, Mukora R, Ndebele F, Pienaar J, Khumalo C, Xu X, et al. Cost savings  
525 in male circumcision post-operative care using two-way text-based follow-up  
526 in rural and urban South Africa. *PLOS ONE*. 2023 Nov 16;18(11):e0294449.
- 527 19. Gold HT, McDermott C, Hoomans T, Wagner TH. Cost data in  
528 implementation science: categories and approaches to costing. *Implement  
529 Sci*. 2022 Jan 28;17(1):11.
- 530 20. Shukla R, Kapur A. Methods and Lessons From Costing a Large mHealth  
531 Intervention at Scale in India. *Front Public Health [Internet]*. 2022 Jun 2 [cited  
532 2024 Sep 5];10.

## 533 **Supporting information**

- 534 **S1 Table. Costing tool for 2wT implementation.** Modifiable Excel spreadsheet for 2wT  
535 costing during stepped wedge expansion study and for additional scenario analysis.

medRxiv preprint doi: <https://doi.org/10.1101/2024.11.26.24317997>; this version posted November 28, 2024. The copyright holder for this preprint (which was not certified by peer review) is the author/funder, who has granted medRxiv a license to display the preprint in perpetuity. It is made available under a [CC-BY 4.0 International license](#).

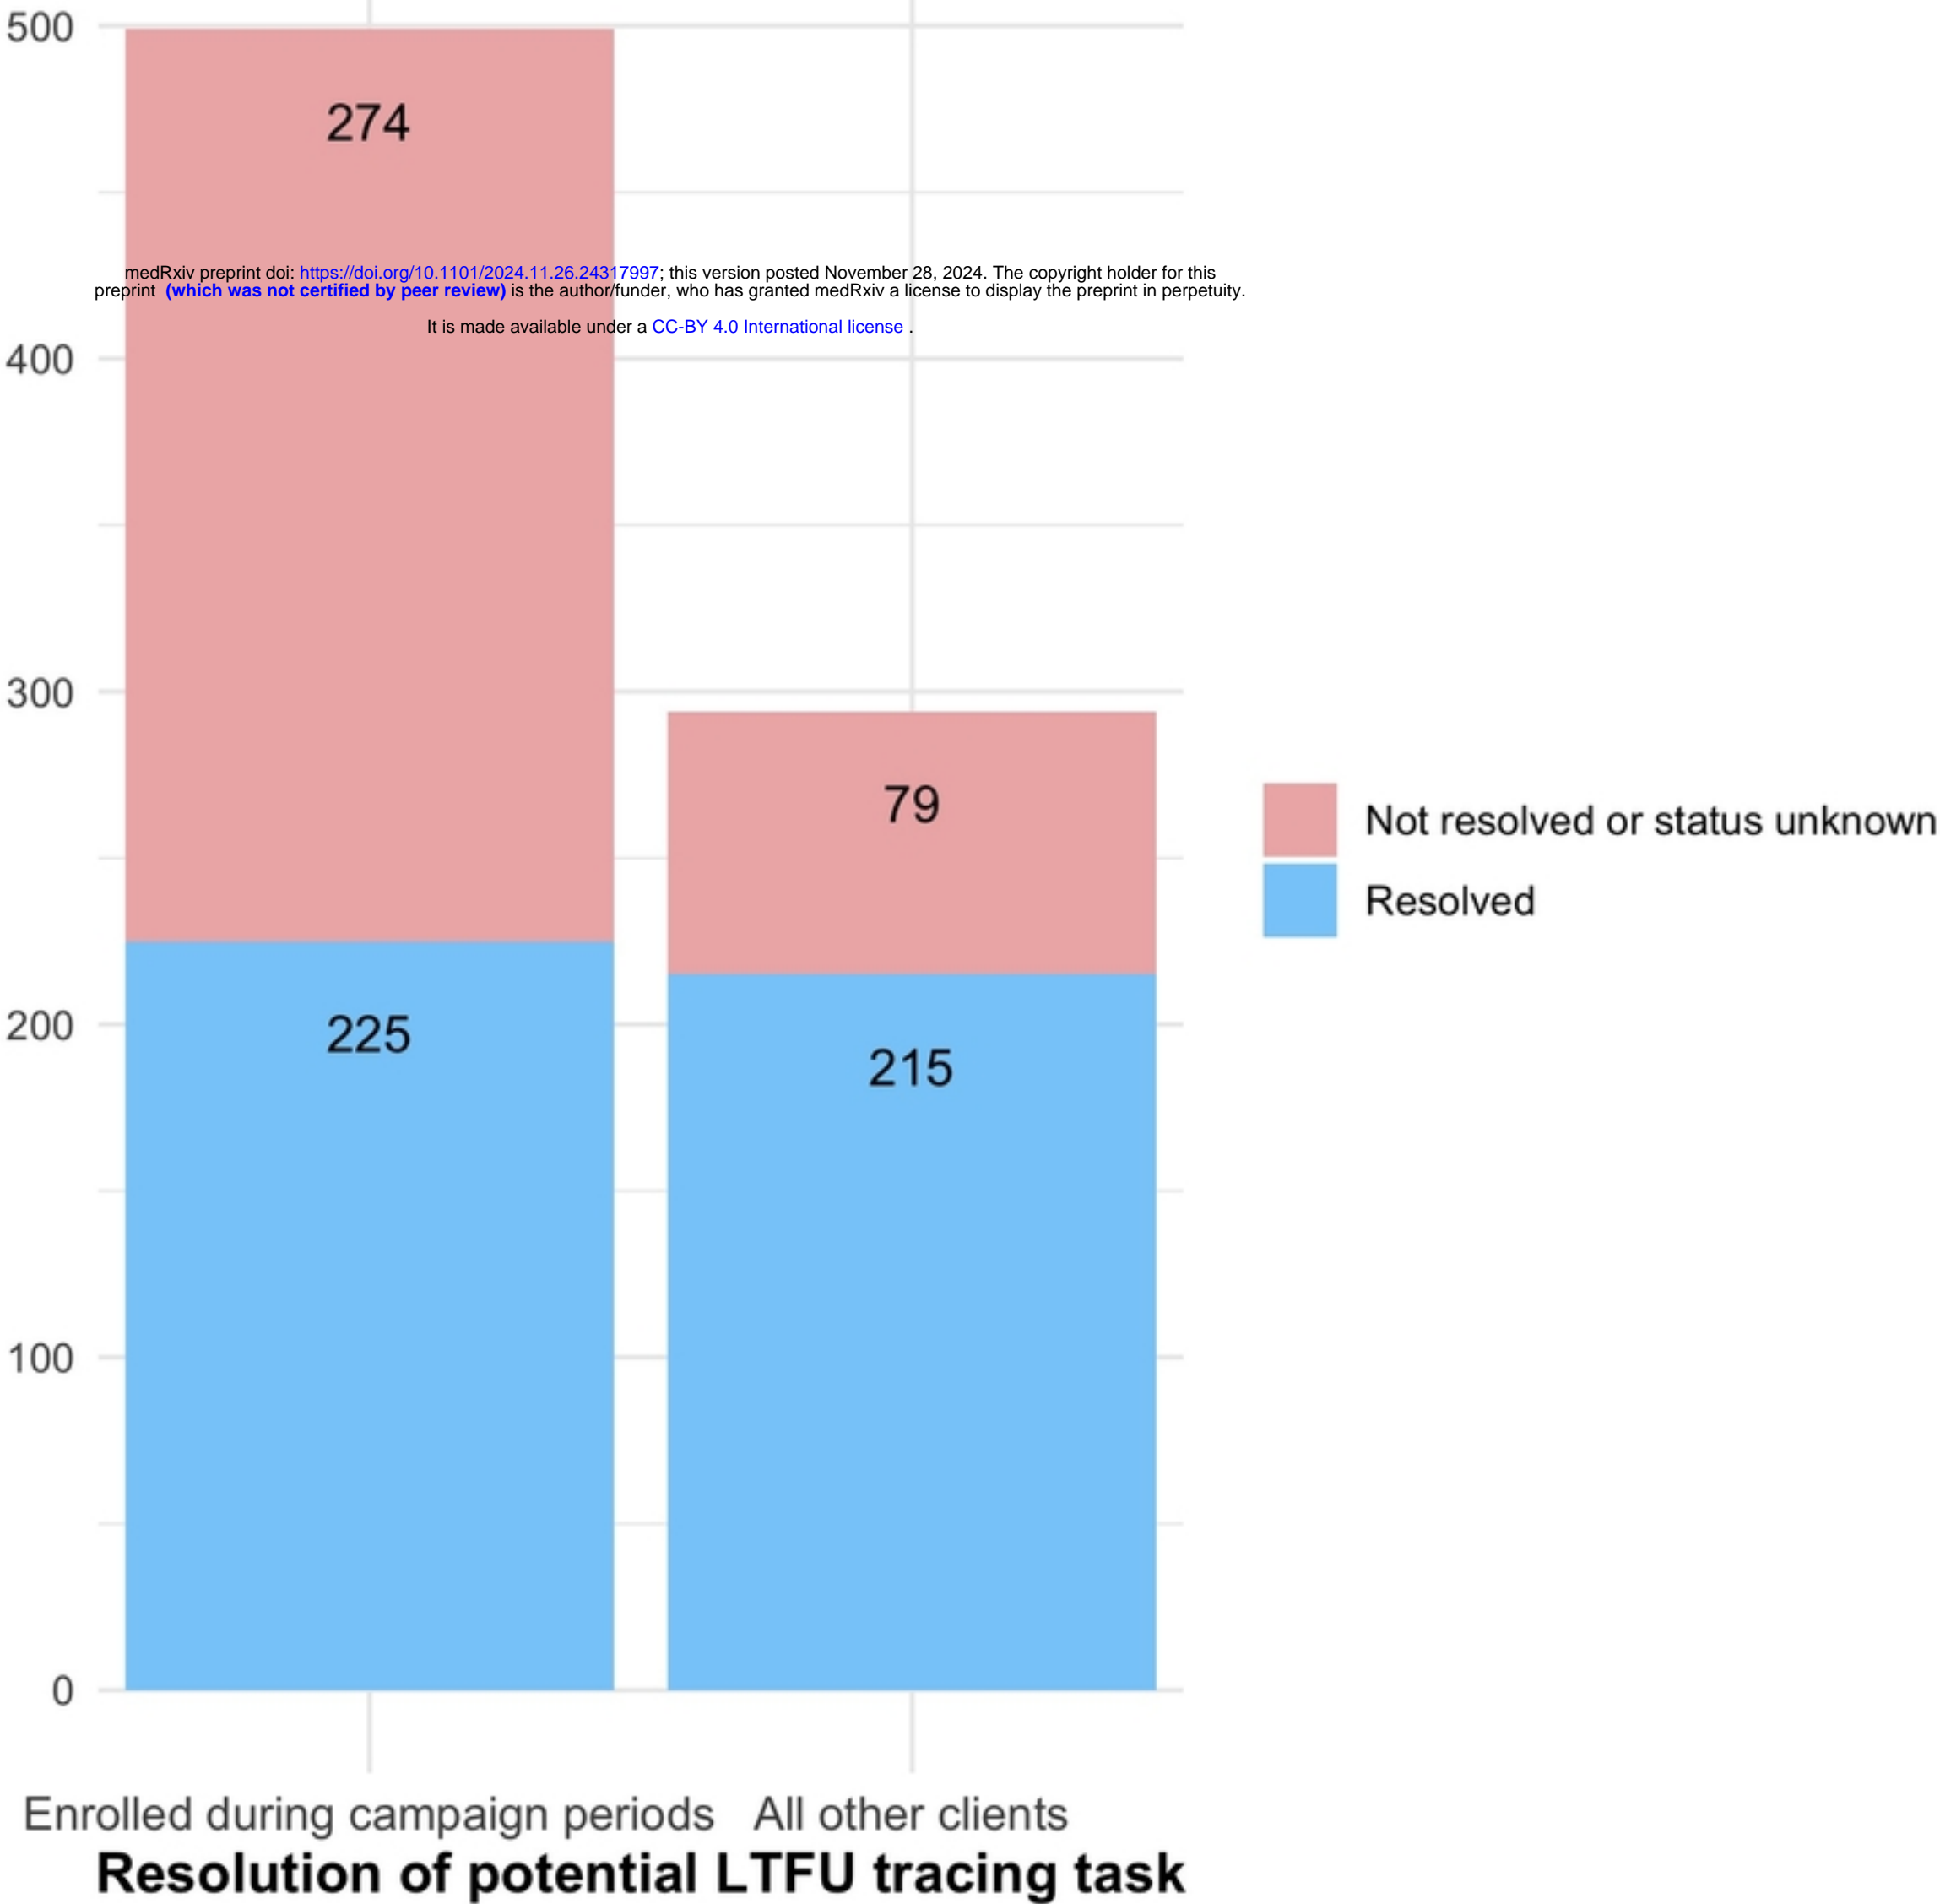

Figure 1

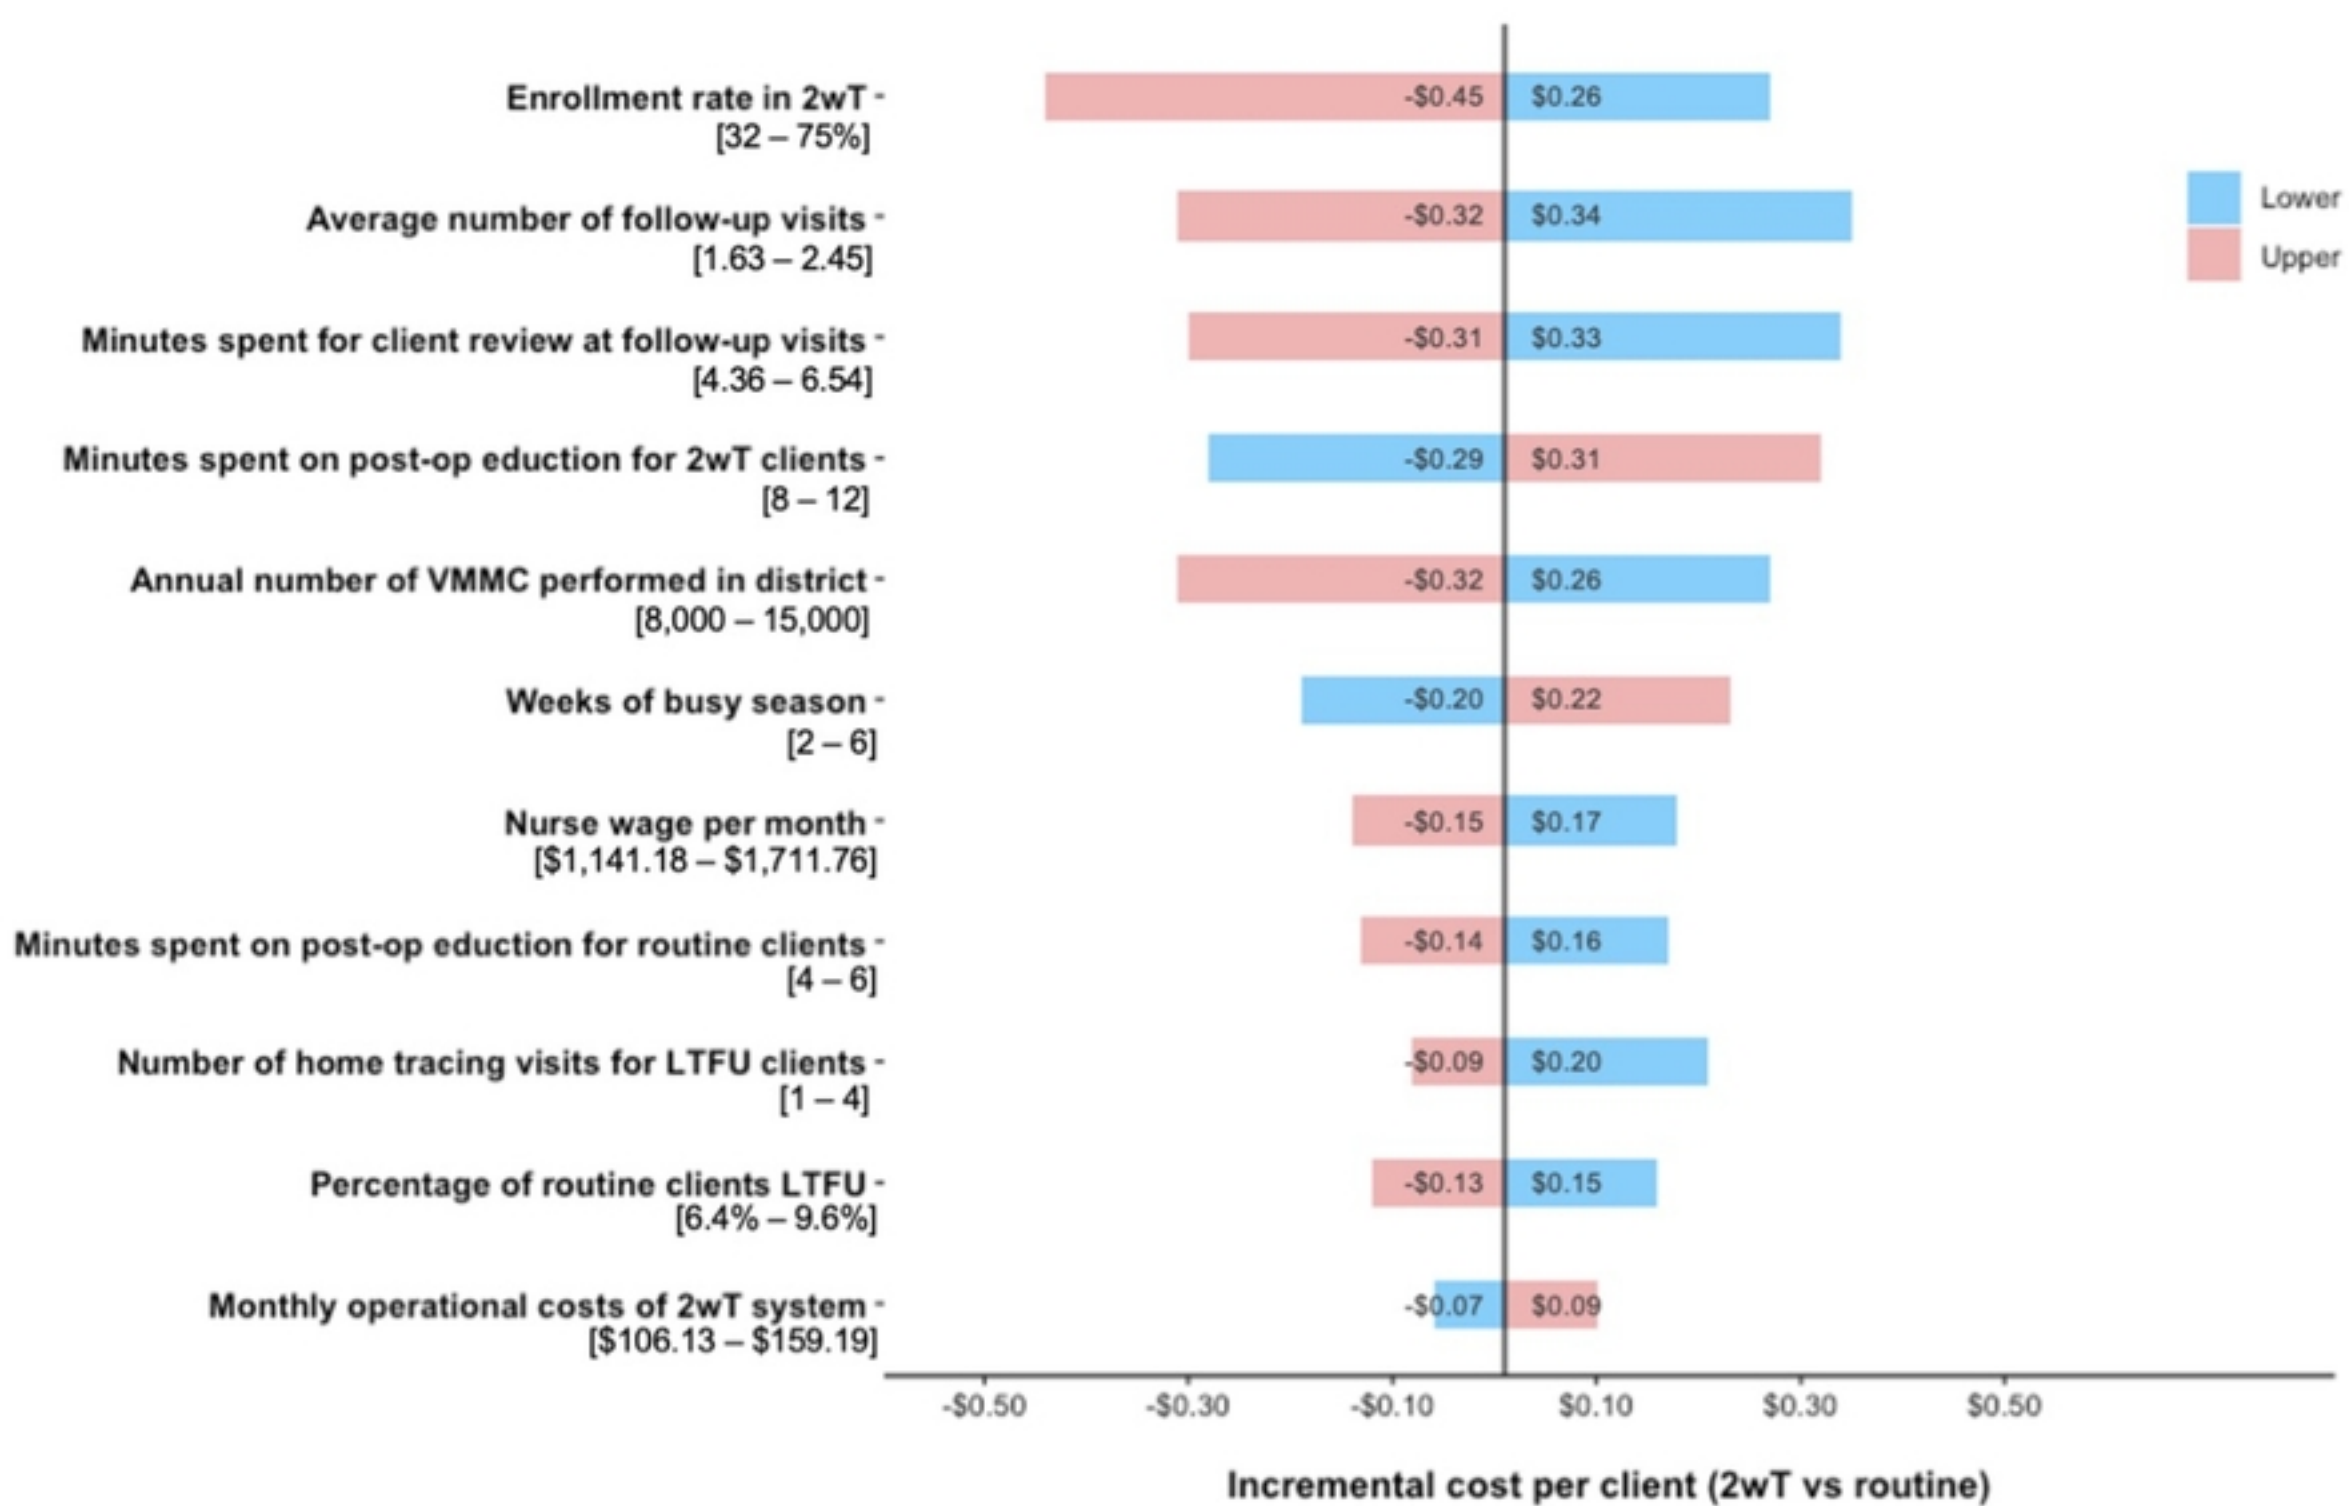

Figure 2
